# Supplementary material
Source: publisher figshare collection journal article supplement (https://gsapubs.figshare.com/ndownloader/files/23305292)
Supplement: Supplementary file 1 [file 23305292]

## Sheet: Moho_compilation_revision
Source	Point	Lat.	Lon.	Top	Bottom	Thick	St. Dv.	Basin	Author	Year1	Year2	DOI
1	1	23	-43.1	5	12	7	0.7	A	Abrams	1988	1980	10.1029/JB093iB04p03195
1	2	23.7	-43.9	5	11	6	0.7	A	Abrams	1988	1980	10.1029/JB093iB04p03195
2	3	73.9	-68	7.2	13.1	5.9	1	A	Altenbend	2016	2010	10.1016/j.tecto.2016.04.001
3	4	34.75	-35.45	2.8	8.5	5.7	0.7	A	Ambos	1986	1980	10.1016/0264-3707(86)90024-4
3	5	35.4	-35.3	2.7	7.9	5.2	0.7	A	Ambos	1986	1980	10.1016/0264-3707(86)90024-4
4	6	22.7	-43.6	4.7	10	5.3	1	A	Barrett	1979	1975	10.2973/dsdp.proc.45.1979
4	7	22.95	-43.5	4.2	11.7	7.5	1	A	Barrett	1979	1975	10.2973/dsdp.proc.45.1979
4	8	22.8	-43.45	4.2	10.2	6	1	A	Barrett	1979	1975	10.2973/dsdp.proc.45.1979
4	9	23	-43.4	4.9	10.6	5.7	1	A	Barrett	1979	1975	10.2973/dsdp.proc.45.1979
5	10	-24.5	11.5	7.7	15.8	8.1	1.2	A	Bauer	2000	1995	10.1029/2000JB900227
5	11	-25.1	11.6	7.8	14.3	6.5	1.2	A	Bauer	2000	1995	10.1029/2000JB900227
6	12	-43.3	-53	9	14.9	5.9	0.7	A	Becker	2014	2004	10.5194/se-5-1011-2014
6	13	-46.9	-54.7	8.7	16.7	8	0.7	A	Becker	2014	2004	10.5194/se-5-1011-2014
7	14	32.3	-12.8	7.4	14.9	7.5	0.5	A	Biari	2015	2011	10.1016/j.tecto.2015.06.019
8	15	67.1	-4.1	3.4	7.8	4.4	0.7	A	Brandsdottir	2015	2000	10.1002/2014gc005540
9	16	66.2	-3.9	4.3	8.2	3.9	1	A	Breivik	2006	2000	10.1029/2005JB004004
9	17	65.7	-2.2	4.5	9	4.5	1	A	Breivik	2006	2000	10.1029/2005JB004004
10	18	-8.5	-13	2.7	8	5.3	1.2	A	Bruguier	2003	1993	10.1029/JB001172
11	19	21.18	-66.05	7.9	13.2	5.3	1	A	Bunce	1969	1963	10.1029/JB074i012p03082
11	20	21.13	-66.33	5.7	9.8	4.1	1	A	Bunce	1969	1963	10.1029/JB074i012p03082
11	21	21.18	-66.36	6.2	9.4	3.2	1	A	Bunce	1969	1963	10.1029/JB074i012p03082
12	22	36.16	-23.5	4	11.5	7.5	1	A	Calvert	1985	1982	10.1016/0012-821X(85)90187-6
13	23	51.85	-30.9	2.5	9.8	7.3	1.2	A	Calvert	1986	1981	10.1144/gsjgs.143.5.0819
14	24	23.3	-44.75	3.9	9	5.1	0.5	A	Canales	2000	1997	10.1029/2000JB900301
14	25	23.35	-45.1	3.6	6.5	2.9	0.5	A	Canales	2000	1997	10.1029/2000JB900301
15	26	34.83	-36.67	1.9	9.7	7.8	0.5	A	Canales	2000	1996	10.1029/1999JB900379
15	27	35.25	-36.17	2.7	7	4.3	0.5	A	Canales	2000	1996	10.1029/1999JB900379
15	28	34.33	-36.78	1.6	8	6.4	0.5	A	Canales	2000	1996	10.1029/1999JB900379
16	29	26.01	-44.92	4.5	8.9	4.4	0.7	A	Canales	2007	2003	10.1029/2007GC001629
17	30	24.5	-66	6	13.7	7.7	1.2	A	Cary	1988	1981	10.1029/JB093iB11p13575
18	31	27.68	-21.1	5.3	13.5	8.2	1	A	Collier	1998	1993	10.1046/j.1365-246X.1998.00675.x
18	32	28.08	-20.87	5.5	12.6	7.1	1	A	Collier	1998	1993	10.1046/j.1365-246X.1998.00675.x
19	33	34.66	-10.8	7.2	15.3	8.1	1	A	Contrucci	2004	2001	10.1111/j.1365-246X.2004.02391.x
20	34	21.75	-45.25	3.2	10.8	7.6	0.5	A	Dannowski	2011	2004	doi:10.1029/2011GC003534
20	35	21.4	-45.4	4.2	9.2	5	0.5	A	Dannowski	2011	2004	doi:10.1029/2011GC003534
21	36	22.32	-45.23	2.9	5.8	2.9	0.5	A	Dannowski	2013	2010	10.1029/2009JB006943
21	37	22.27	-44.88	4.1	9.4	5.3	0.5	A	Dannowski	2013	2010	10.1029/2009JB006943
22	38	57.8	-54.1	5.2	9.9	4.7	0.5	A	Delescluse	2015	2009	10.1002/2014jb011739
22	39	58.15	-53.2	5.9	10.1	4.2	0.5	A	Delescluse	2015	2009	10.1002/2014jb011739
22	40	58.55	-52.2	5.8	7.1	1.3	0.5	A	Delescluse	2015	2009	10.1002/2014jb011739
23	41	24.15	-43.9	3.2	8.6	5.4	1	A	Detrick	1980	1977	10.1029/JB085iB07p03759
23	42	22.8	-44.2	3.9	9.9	6	1	A	Detrick	1980	1977	10.1029/JB085iB07p03759
24	43	75.5	35.62	5.2	11.7	6.5	0.5	A	Dossing	2012	2007	10.1029/2011jb008393
25	44	35.2	-36.33	3.5	7.5	4	0.5	A	Dunn	2005	1996	10.1029/2004JB003473
25	45	34.88	-36.43	2.3	10.2	7.9	0.5	A	Dunn	2005	1996	10.1029/2004JB003473
25	46	34.7	-36.5	3.4	6.9	3.5	0.5	A	Dunn	2005	1996	10.1029/2004JB003473
26	47	36.75	-33.3	3.1	6	2.9	0.7	A	Fowler	1976	1973	10.1111/j.1365-246X.1976.tb07097.x
26	48	36.85	-33.45	2.8	7.9	5.1	0.7	A	Fowler	1976	1973	10.1111/j.1365-246X.1976.tb07097.x
26	49	36.7	-33.1	2.7	8	5.3	0.7	A	Fowler	1976	1973	10.1111/j.1365-246X.1976.tb07097.x
27	50	45.4	-27.7	3	11.3	8.3	1	A	Fowler	1978	1973	10.1111/j.1365-246X.1978.tb06762.x
27	51	45.2	-27.3	3.2	9.7	6.5	1	A	Fowler	1978	1973	10.1111/j.1365-246X.1978.tb06762.x
28	52	45.6	-28.7	2.2	9	6.8	1.5	A	Fowler	1979	1968	10.1111/j.1365-246X.1979.tb04777.x
29	53	35.3	-37.95	3.4	10.8	7.4	1	A	Fox	1976	1974	10.1029/JB081i023p04117
29	54	35.75	-37.6	5	12.1	7.1	1	A	Fox	1976	1974	10.1029/JB081i023p04117
30	55	41.38	-57.25	8.1	12.9	4.8	0.5	A	Funck	2004	2001	10.1029/2004JB003008
31	56	48.28	-40.29	5.9	11	5.1	0.7	A	Gerlings	2011	2002	10.1111/j.1365-246X.2011.04931.x
32	57	7.2	-50.4	8.7	12.5	3.8	1	A	Greenroyd	2007	2003	10.1111/j.1365-246X.2007.03372.x
33	58	66.25	-5	4.2	10.8	6.6	1	A	Grevemeyer	2001	1992	10.1023/a:1004288815129
33	59	65.6	-2.2	4.2	10.7	6.5	1	A	Grevemeyer	2001	1992	10.1023/a:1004288815129
34	60	24.25	-22.9	6.2	13.8	7.6	1	A	Henstock	1996	1990	10.1029/96JB00092
34	61	24.35	-22.82	6.1	13.3	7.2	1	A	Henstock	1996	1990	10.1029/96JB00092
34	62	24.9	-22.75	6.9	13	6.1	1	A	Henstock	1996	1990	10.1029/96JB00092
35	63	77	-1.8	5.8	8.1	2.3	0.7	A	Hermann	2013	2009	10.1093/gji/ggt048
35	64	76.67	1.5	3.4	7.3	3.9	0.7	A	Hermann	2013	2009	10.1093/gji/ggt048
35	65	76.33	4.9	3.8	5.8	2	0.7	A	Hermann	2013	2009	10.1093/gji/ggt048
35	66	76	8.1	3.5	6.3	2.8	0.7	A	Hermann	2013	2009	10.1093/gji/ggt048
36	67	34.71	-36.47	2.8	8.2	5.4	1	A	Hooft	2000	1996	10.1029/1999JB900442
36	68	35.32	-36.52	3.2	6.2	3	1	A	Hooft	2000	1996	10.1029/1999JB900442
36	69	34.25	-37.16	3.5	9.8	6.3	1	A	Hooft	2000	1996	10.1029/1999JB900442
36	70	33.67	-37.69	4	6.3	2.3	1	A	Hooft	2000	1996	10.1029/1999JB900442
36	71	33.92	-37.75	3.7	8.4	4.7	1	A	Hooft	2000	1996	10.1029/1999JB900442
37	72	34.83	-36.2	2.2	11	8.8	0.5	A	Hosford	2001	1996	10.1029/2001JB000235
37	73	34.92	-36.67	1.7	10.1	8.4	0.5	A	Hosford	2001	1996	10.1029/2001JB000235
37	74	35.17	-36.58	2.2	7.9	5.7	0.5	A	Hosford	2001	1996	10.1029/2001JB000235
37	75	34.63	-36.3	2.7	9.2	6.5	0.5	A	Hosford	2001	1996	10.1029/2001JB000235
38	76	30.05	-73.48	7.1	11.2	4.1	1.5	A	Houtz	1980	1974	10.1130/0016-7606(1980)91<406:csotna>2.0.co;2
38	77	23.92	-68.88	6.5	12.5	6	1.5	A	Houtz	1980	1974	10.1130/0016-7606(1980)91<406:csotna>2.0.co;2
38	78	31.37	-72.38	7.1	13.4	6.3	1.5	A	Houtz	1980	1974	10.1130/0016-7606(1980)91<406:csotna>2.0.co;2
38	79	30.22	-73.05	7.5	12.6	5.1	1.5	A	Houtz	1980	1974	10.1130/0016-7606(1980)91<406:csotna>2.0.co;2
38	80	31.35	-75.3	8.2	16.1	7.9	1.5	A	Houtz	1980	1974	10.1130/0016-7606(1980)91<406:csotna>2.0.co;2
38	81	36.37	-69.47	6.4	15.1	8.7	1.5	A	Houtz	1980	1974	10.1130/0016-7606(1980)91<406:csotna>2.0.co;2
38	82	35.68	-70.65	6.1	12.9	6.8	1.5	A	Houtz	1980	1974	10.1130/0016-7606(1980)91<406:csotna>2.0.co;2
38	83	34.58	-69.07	6.2	12	5.8	1.5	A	Houtz	1980	1974	10.1130/0016-7606(1980)91<406:csotna>2.0.co;2
38	84	33.82	-69.3	6.1	12.3	6.2	1.5	A	Houtz	1980	1974	10.1130/0016-7606(1980)91<406:csotna>2.0.co;2
38	85	32.73	-70.13	6.7	13	6.3	1.5	A	Houtz	1980	1974	10.1130/0016-7606(1980)91<406:csotna>2.0.co;2
38	86	30.63	-74.3	7.7	14.1	6.4	1.5	A	Houtz	1980	1974	10.1130/0016-7606(1980)91<406:csotna>2.0.co;2
38	87	37.62	-65.72	5.1	9.7	4.6	1.5	A	Houtz	1980	1974	10.1130/0016-7606(1980)91<406:csotna>2.0.co;2
38	88	37.75	-63.05	6.4	11.8	5.4	1.5	A	Houtz	1980	1974	10.1130/0016-7606(1980)91<406:csotna>2.0.co;2
38	89	34.87	-68.52	6.3	13.8	7.5	1.5	A	Houtz	1980	1974	10.1130/0016-7606(1980)91<406:csotna>2.0.co;2
38	90	35.17	-68.98	6.1	11.7	5.6	1.5	A	Houtz	1980	1974	10.1130/0016-7606(1980)91<406:csotna>2.0.co;2
38	91	35.2	-69.32	6.2	11.3	5.1	1.5	A	Houtz	1980	1974	10.1130/0016-7606(1980)91<406:csotna>2.0.co;2
39	92	22.75	-7.12	4.6	8.1	3.5	0.7	A	Hussong	1978	1974	10.2973/dsdp.proc.45.102.1979
40	93	84.4	11	4	6.7	2.7	1.2	A	Jackson	1982	1979	10.1029/JB087iB03p01773
41	94	22.75	-46.08	4.3	10.9	6.6	0.5	A	Jacobson	1984	1979	10.2973/dsdp.proc.78b.113.1984
42	95	34.5	-10.6	7.8	16.2	8.4	1	A	Jaffal	2009	2001	10.1016/j.crte.2009.04.003
43	96	76.4	7.4	2.9	8.2	5.3	0.7	A	Jokat	2012	2009	10.1029/2012gl051199
43	97	76	7.5	3.6	7.4	3.8	0.7	A	Jokat	2012	2009	10.1029/2012gl051199
44	98	84.1	0	3.9	8.8	4.9	1	A	Jokat	2006	2001	10.1111/j.1365-246X.2006.03278.x
44	99	83.5	-5	4	6.5	2.5	1	A	Jokat	2006	2001	10.1111/j.1365-246X.2006.03278.x
44	100	85.9	14	4.9	7.4	2.5	1	A	Jokat	2006	2001	10.1111/j.1365-246X.2006.03278.x
44	101	86	24	4.6	6.7	2.1	1	A	Jokat	2006	2001	10.1111/j.1365-246X.2006.03278.x
44	102	86.9	65	4.9	8.4	3.5	1	A	Jokat	2006	2001	10.1111/j.1365-246X.2006.03278.x
44	103	86.7	42.5	4	7.3	3.3	1	A	Jokat	2006	2001	10.1111/j.1365-246X.2006.03278.x
45	104	76.7	8.2	4.5	8.3	3.8	1	A	Kandilarov	2008	2002	10.1007/s11001-008-9050-0
45	105	76.4	10.9	6.2	10.9	4.7	1	A	Kandilarov	2008	2002	10.1007/s11001-008-9050-0
46	106	23.6	-46.5	3	9.1	6.1	1.2	A	Kasahara	1980	1975	10.1016/0025-3227(80)90031-6
46	107	23.7	-46.5	3	7.1	4.1	1.2	A	Kasahara	1980	1975	10.1016/0025-3227(80)90031-6
46	108	23.1	-46.1	3	8.5	5.5	1.2	A	Kasahara	1980	1975	10.1016/0025-3227(80)90031-6
46	109	23	-45.8	3	8.1	5.1	1.2	A	Kasahara	1980	1975	10.1016/0025-3227(80)90031-6
47	110	26.41	-75.04	5.6	11.6	6	1.5	A	Katz	1956	1951	10.1130/0016-7606(1956)67[475:smitao]2.0.co;2
47	111	27.28	-75.02	5.3	12.6	7.3	1.5	A	Katz	1956	1951	10.1130/0016-7606(1956)67[475:smitao]2.0.co;2
47	112	28.05	-73.73	6.2	14	7.8	1.5	A	Katz	1956	1951	10.1130/0016-7606(1956)67[475:smitao]2.0.co;2
47	113	29.425	-72.88	5.8	12.9	7.1	1.5	A	Katz	1956	1951	10.1130/0016-7606(1956)67[475:smitao]2.0.co;2
47	114	31.68	-67.72	5.8	11.5	5.7	1.5	A	Katz	1956	1951	10.1130/0016-7606(1956)67[475:smitao]2.0.co;2
48	115	45.6	-28.3	2.4	7.5	5.1	1	A	Keen	1970	1968	10.1111/j.1365-246X.1970.tb06087.x
49	116	71.35	4.2	4	8.2	4.2	0.7	A	Klingelhoefer	2000	1988	10.1046/j.1365-246x.2000.00098.x
49	117	71.75	3.94	3.4	7.8	4.4	0.7	A	Klingelhoefer	2000	1988	10.1046/j.1365-246x.2000.00098.x
49	118	72.13	3.05	2.1	5.8	3.7	0.7	A	Klingelhoefer	2000	1988	10.1046/j.1365-246x.2000.00098.x
49	119	72.31	2.51	2.1	5	2.9	0.7	A	Klingelhoefer	2000	1988	10.1046/j.1365-246x.2000.00098.x
50	120	-8.2	-14.7	4	9.3	5.3	1	A	Klingelhoefer	2001	1999	10.1016/S0012-821X(01)00362-4
51	121	23.92	-21.9	7.8	13.2	5.4	0.7	A	Klingelhoefer	2009	2002	10.1016/j.tecto.2008.07.022
52	122	16.9	-58.9	10.5	18.3	7.8	0.5	A	Kopp	2011	2004	10.1016/j.epsl.2011.01.024
53	123	38.75	-39.04	5.7	10.9	5.2	1.2	A	LePichon	1965	1955	10.1029/JZ070i002p00319
53	124	39.12	-37.13	4.6	8.4	3.8	1.2	A	LePichon	1965	1955	10.1029/JZ070i002p00319
53	125	35.29	-26.04	4.1	9.4	5.3	1.2	A	LePichon	1965	1955	10.1029/JZ070i002p00319
53	126	31.88	-32.71	4.4	9.3	4.9	1.2	A	LePichon	1965	1955	10.1029/JZ070i002p00319
53	127	31.85	-31.14	5	11.1	6.1	1.2	A	LePichon	1965	1955	10.1029/JZ070i002p00319
53	128	2.45	-19.66	5.5	9.9	4.4	1.2	A	LePichon	1965	1955	10.1029/JZ070i002p00319
53	129	0.17	-22.68	3.9	9.4	5.5	1.2	A	LePichon	1965	1955	10.1029/JZ070i002p00319
53	130	0.08	-23.86	3.8	8.3	4.5	1.2	A	LePichon	1965	1955	10.1029/JZ070i002p00319
53	131	-0.92	-26.24	4.6	7.9	3.3	1.2	A	LePichon	1965	1955	10.1029/JZ070i002p00319
53	132	-1.27	26.67	4.6	9.4	4.8	1.2	A	LePichon	1965	1955	10.1029/JZ070i002p00319
54	133	75	8.8	3.3	7.6	4.3	0.7	A	Libak	2012	2008	10.1016/j.tecto.2011.09.020
54	134	74.8	12.3	6.2	10.8	4.6	0.7	A	Libak	2012	2008	10.1016/j.tecto.2011.09.020
55	135	31.5	-69	6	12.9	6.9	0.5	A	Lizarralde	2004	2001	10.1038/nature03140
55	136	31	-68.2	6.1	12.6	6.5	0.5	A	Lizarralde	2004	2001	10.1038/nature03140
55	137	29.7	-65	5.7	11.3	5.6	0.5	A	Lizarralde	2004	2001	10.1038/nature03140
56	138	10.75	-42.5	4.6	9.6	5	1.2	A	Ludwig	1980	1975	10.1016/0025-3227(80)90024-9
56	139	10.85	-42.5	5.8	10.5	4.7	1.2	A	Ludwig	1980	1975	10.1016/0025-3227(80)90024-9
57	140	26.9	-70.08	6.3	13.4	7.1	0.5	A	Minshull	1991	1987	10.1029/91JB00431
57	141	27.4	-69.88	6.5	14.1	7.6	0.5	A	Minshull	1991	1987	10.1029/91JB00431
58	142	-8.61	-13.13	2.9	8.6	5.7	0.7	A	Minshull	2003	1993	10.1029/2002JB002360
58	143	-8.88	-13.15	3	10.1	7.1	0.7	A	Minshull	2003	1993	10.1029/2002JB002360
59	144	31.8	-72.7	5.8	13.7	7.9	0.5	A	Mithal	1989	1985	10.1111/j.1365-246X.1989.tb00501.x
60	145	27.6	-70.05	6.3	14.3	8	0.5	A	Morris	1993	1985	10.1029/93JB00557
60	146	27.5	-70.35	6.6	13.6	7	0.5	A	Morris	1993	1985	10.1029/93JB00557
60	147	27.9	-71.15	6.6	14.6	8	0.5	A	Morris	1993	1985	10.1029/93JB00557
61	148	24.5	-67.5	3	11	8	0.7	A	NAT_Study_Group	1985	1981	10.1029/JB090iB12p10321
61	149	23	-43	3	9.2	6.2	0.7	A	NAT_Study_Group	1985	1981	10.1029/JB090iB12p10321
62	150	58.4	-53.4	1.8	4.5	2.7	1	A	Osler	1992	1988	10.1016/0012-821X(92)90026-R
62	151	58.65	-54.3	2.2	6.3	4.1	1	A	Osler	1992	1988	10.1016/0012-821X(92)90026-R
63	152	-37	23.65	6.1	12.1	6	0.7	A	Parsiegla	2009	2005	1029/2008gc002196
64	153	36.45	-13.9	5.7	12.1	6.4	1.2	A	Peirce	1991	1988	10.1111/j.1365-246X.1991.tb03898.x
64	154	38.15	-15	6	11	5	1.2	A	Peirce	1991	1988	10.1111/j.1365-246X.1991.tb03898.x
65	155	13.75	-24.2	5.2	12	6.8	1	A	Pim	2008	2004	10.1016/j.epsl.2008.05.012
66	156	-4.73	-11.78	2.6	8.7	6.1	0.3	A	Planert	2009	2000	10.1029/2008JB006103
66	157	-5.06	-11.71	2.6	5.3	2.7	0.3	A	Planert	2009	2000	10.1029/2008JB006103
66	158	-5.21	-11.65	2.9	8	5.1	0.3	A	Planert	2009	2000	10.1029/2008JB006103
66	159	-4.7	-12.3	1.9	10.8	8.9	0.3	A	Planert	2009	2000	10.1029/2008JB006103
66	160	-5.1	-12.2	3	7.9	4.9	0.3	A	Planert	2009	2000	10.1029/2008JB006103
66	161	-4.8	-12.28	2.8	10.3	7.5	0.3	A	Planert	2009	2000	10.1029/2008JB006103
66	162	-4.75	-12.06	2.9	9.7	6.8	0.3	A	Planert	2009	2000	10.1029/2008JB006103
67	163	36.8	-33.55	1.5	6.2	4.7	1	A	Poehls	1974	1972	10.1029/JB079i023p03370
68	164	35.65	-26.25	4.1	10.5	6.4	1.2	A	Potts	1986	1982	10.1111/j.1365-246X.1986.tb00668.x
68	165	35.9	-26.4	4.5	9.4	4.9	1.2	A	Potts	1986	1982	10.1111/j.1365-246X.1986.tb00668.x
69	166	10.85	-44.4	4.9	11.3	6.4	1.2	A	Potts	1986	1982	10.1111/j.1365-246X.1986.tb03840.x
69	167	10.85	-44	4.7	10	5.3	1.2	A	Potts	1986	1982	10.1111/j.1365-246X.1986.tb03840.x
70	168	34.6	-11.5	6.2	11	4.8	1.2	A	Purdy	1975	1971	10.1111/j.1365-246X.1975.tb06206.x
70	169	35.7	-13.2	6.8	12	5.2	1.2	A	Purdy	1975	1971	10.1111/j.1365-246X.1975.tb06206.x
71	170	31.3	-68.25	6	13.2	7.2	1	A	Purdy	1983	1979	10.1111/j.1365-246X.1983.tb02808.x
72	171	22.9	-44.97	3.5	9.6	6.1	1.2	A	Purdy	1986	1980	10.1029/JB091iB03p03739
73	172	66.2	1.3	4.2	9.8	5.6	1	A	Raum	2006	1996	10.1016/j.tecto.2005.12.008
74	173	76.9	7.5	2.4	5	2.6	1.2	A	Ritzmann	2002	1997	10.1023/B:MARI.0000018168.89762.a4
74	174	77.2	10.1	2.5	6.1	3.6	1.2	A	Ritzmann	2002	1997	10.1023/B:MARI.0000018168.89762.a4
75	175	5.8	-46.1	6.9	14	7.1	1	A	Rodger	2006	2003	10.1130/G22966A.1
76	176	-9.3	35.22	8.3	16	7.7	0.5	A	Sallares	2011	2009	10.1016/j.epsl.2011.09.003
76	177	-9.1	35.6	7.7	15.5	7.8	0.5	A	Sallares	2011	2009	10.1016/j.epsl.2011.09.003
77	178	43.7	-23.5	4.5	11.4	6.9	1	A	Searle	1978	1970	10.1111/j.1365-246X.1978.tb03742.x
77	179	44.2	-22.1	4.3	12.1	7.8	1	A	Searle	1978	1970	10.1111/j.1365-246X.1978.tb03742.x
78	180	37.32	-32.4	1.5	9.5	8	0.5	A	Seher	2010	2005	10.1029/2009JB006650
78	181	37.41	-32.21	2.7	8.2	5.5	0.5	A	Seher	2010	2005	10.1029/2009JB006650
79	182	2.8	-18.9	6.2	10.5	4.3	1.2	A	Sheridan	1969	1965	10.1029/JB074i010p02512
80	183	35.4	-36.8	2.5	9.1	6.6	1.2	A	Sinha	1983	1979	10.1111/j.1365-246X.1983.tb05007.x
80	184	35.7	-36.7	3.1	6.3	3.2	1.2	A	Sinha	1983	1979	10.1111/j.1365-246X.1983.tb05007.x
80	185	36	-36.6	3.2	7.1	3.9	1.2	A	Sinha	1983	1979	10.1111/j.1365-246X.1983.tb05007.x
81	186	11.52	-23.52	5.2	9.2	4	1.5	A	Spathopoulos	1993	1985	10.1016/0040-1951(93)90280-W
81	187	11	-23.03	5.3	11.4	6.1	1.5	A	Spathopoulos	1993	1985	10.1016/0040-1951(93)90280-W
82	188	41.8	-30.7	1.8	7.4	5.6	1.2	A	Steinmetz	1977	1974	10.1111/j.1365-246X.1977.tb04178.x
83	189	38.7	-38.8	5	11	6	1.5	A	Talwani	1965	1962	10.1029/JZ070i002p00341
83	190	38.9	-36.9	4.2	8.9	4.7	1.5	A	Talwani	1965	1962	10.1029/JZ070i002p00341
83	191	38.6	-35.5	3.8	8.1	4.3	1.5	A	Talwani	1965	1962	10.1029/JZ070i002p00341
83	192	32	-32.5	4.3	9.8	5.5	1.5	A	Talwani	1965	1962	10.1029/JZ070i002p00341
83	193	32	-31.6	4.4	11	6.6	1.5	A	Talwani	1965	1962	10.1029/JZ070i002p00341
84	194	-33.3	-14.35	3.4	6.9	3.5	1.2	A	Tolstoy	1993	1990	10.1126/science.262.5134.726
84	195	-32.88	-14.45	2.3	10.2	7.9	1.2	A	Tolstoy	1993	1990	10.1126/science.262.5134.726
85	196	57.8	-21.1	3.9	10.6	6.7	1	A	Vogt	1998	1988	10.1029/98JB00604
86	197	72.33	-12	2.6	8.3	5.7	1	A	Voss	2007	2003	10.1111/j.1365-246X.2007.03438.x
86	198	73.2	-13.1	3.2	10.1	6.9	1	A	Voss	2007	2003	10.1111/j.1365-246X.2007.03438.x
87	199	26.17	-17.93	6.1	12.5	6.4	1	A	Watts	1997	1993	10.1038/315105a0
87	200	30.16	-15.17	6.2	12.7	6.5	1	A	Watts	1997	1993	10.1038/315105a0
88	201	29.15	-27	4.4	10.6	6.2	1	A	Weigel	1999	1990	10.1016/s0264-3707(98)00030-1
89	202	51.92	-30.9	2.2	8	5.8	1.2	A	Whitmarsh	1986	1982	10.1111/j.1365-246X.1986.tb05174.x
89	203	52.4	-30.95	4.1	7.6	3.5	1.2	A	Whitmarsh	1986	1982	10.1111/j.1365-246X.1986.tb05174.x
89	204	51.8	-30.95	2.5	10.2	7.7	1.2	A	Whitmarsh	1986	1982	10.1111/j.1365-246X.1986.tb05174.x
90	205	17.25	-23.6	4.7	11.5	6.8	0.5	A	Wilson	2013	2004	10.1093/gji/ggt034
91	206	40.65	-59.3	9.1	12.2	3.1	0.5	A	Wu	2006	2001	10.1111/j.1365-246X.2006.02991.x
92	207	-47.93	101.83	0	5.9	5.9	0.5	I	Baran	2009	2002	10.1111/j.1365-246X.2009.04300.x
92	208	-49.78	109.62	0	5.3	5.3	0.5	I	Baran	2009	2002	10.1111/j.1365-246X.2009.04300.x
93	209	20.2	60.5	5.8	11.8	6	1.2	I	Barton	1990	1986	10.1016/0040-1951(90)90227-y
94	210	-2.75	44.03	7.1	12.9	5.8	1.2	I	Coffin	1986	1981	10.1111/j.1365-246X.1986.tb03832.x
94	211	-1.92	45.29	7.9	14.1	6.2	1.2	I	Coffin	1986	1981	10.1111/j.1365-246X.1986.tb03832.x
94	212	-2.45	44.75	6.8	12.9	6.1	1.2	I	Coffin	1986	1981	10.1111/j.1365-246X.1986.tb03832.x
94	213	-3.27	44.13	7.2	13.1	5.9	1.2	I	Coffin	1986	1981	10.1111/j.1365-246X.1986.tb03832.x
94	214	-5.07	43.02	6	13.3	7.3	1.2	I	Coffin	1986	1981	10.1111/j.1365-246X.1986.tb03832.x
94	215	-5.49	41.62	5.6	13.9	8.3	1.2	I	Coffin	1986	1981	10.1111/j.1365-246X.1986.tb03832.x
94	216	-8.93	41.93	6	11.1	5.1	1.2	I	Coffin	1986	1981	10.1111/j.1365-246X.1986.tb03832.x
95	217	-2.58	56.64	6.2	10.2	4	0.5	I	Collier	2009	2003	10.1029/2008JB005898
95	218	-2.21	56.89	6.3	10.4	4.1	0.5	I	Collier	2009	2003	10.1029/2008JB005898
95	219	-1.97	57.07	6.5	10.5	4	0.5	I	Collier	2009	2003	10.1029/2008JB005898
96	220	-13.28	109.52	3.7	13.2	9.5	1.5	I	Curray	1977	1960	10.1029/JB082i017p02479
96	221	-13.78	115.55	6.3	14.8	8.5	1.5	I	Curray	1977	1960	10.1029/JB082i017p02479
96	222	-13.52	118.43	6.3	14.1	7.8	1.5	I	Curray	1977	1960	10.1029/JB082i017p02479
97	223	23.2	63.18	3	9	6	1	I	Edwards	2008	1997	10.1016/j.epsl.2008.05.007
98	224	-63.12	132.18	8.8	15.2	6.4	1.5	I	Eittreim	1994	1985	10.1029/94JB01903
98	225	-64	141.7	8	12.7	4.7	1.5	I	Eittreim	1994	1985	10.1029/94JB01903
99	226	-2.92	47.03	6.5	14.9	8.4	1.5	I	Francis	1966	1963	10.1098/rsta.1966.0010
100	227	-8.28	70.58	4.6	10.8	6.2	1.5	I	Francis	1966	1962	10.1029/JZ071i002p00427
100	228	-5.35	75.08	5.2	10.4	5.2	1.5	I	Francis	1966	1962	10.1029/JZ071i002p00427
100	229	-5.55	63.73	4.6	10.7	6.1	1.5	I	Francis	1966	1962	10.1029/JZ071i002p00427
100	230	-5.45	60.03	4.7	12.5	7.8	1.5	I	Francis	1966	1962	10.1029/JZ071i002p00427
101	231	-26.93	58.17	5.7	11.1	5.4	1.5	I	Francis	1967	1962	10.1029/JZ072i012p03015
101	232	-31.48	61.87	4.6	10.2	5.6	1.5	I	Francis	1967	1962	10.1029/JZ072i012p03015
101	233	-32.92	62.43	5	11.2	6.2	1.5	I	Francis	1967	1962	10.1029/JZ072i012p03015
101	234	-36.85	76.38	3.5	7.4	3.9	1.5	I	Francis	1967	1962	10.1029/JZ072i012p03015
101	235	-37.25	78.52	2.3	10.8	8.5	1.5	I	Francis	1967	1962	10.1029/JZ072i012p03015
101	236	-37.93	87.65	4.1	12.3	8.2	1.5	I	Francis	1967	1962	10.1029/JZ072i012p03015
101	237	-33.8	96.02	4.9	12.1	7.2	1.5	I	Francis	1967	1962	10.1029/JZ072i012p03015
101	238	-32.75	102.75	5.1	12.8	7.7	1.5	I	Francis	1967	1962	10.1029/JZ072i012p03015
101	239	-33.02	103.5	6	12.9	6.9	1.5	I	Francis	1967	1962	10.1029/JZ072i012p03015
101	240	-32.83	108.68	5.9	10.7	4.8	1.5	I	Francis	1967	1962	10.1029/JZ072i012p03015
101	241	-29.7	111.52	5.7	11.7	6	1.5	I	Francis	1967	1962	10.1029/JZ072i012p03015
101	242	-25.05	104.2	5.2	10.1	4.9	1.5	I	Francis	1967	1962	10.1029/JZ072i012p03015
101	243	-20.72	97.2	5.9	12.1	6.2	1.5	I	Francis	1967	1962	10.1029/JZ072i012p03015
101	244	-16.42	89.32	5.9	10.1	4.2	1.5	I	Francis	1967	1962	10.1029/JZ072i012p03015
101	245	-14.95	108.15	5.9	12	6.1	1.5	I	Francis	1967	1962	10.1029/JZ072i012p03015
101	246	-13.78	115.55	6.2	15.2	9	1.5	I	Francis	1967	1962	10.1029/JZ072i012p03015
101	247	-13.52	118.43	6.2	14.6	8.4	1.5	I	Francis	1967	1962	10.1029/JZ072i012p03015
102	248	-17.1	90.45	5	10.8	5.8	0.7	I	Grevemeyer	2001	1998	10.1046/j.0956-540X.2000.01334.x
102	249	-17.1	89.89	4.8	11.3	6.5	0.7	I	Grevemeyer	2001	1998	10.1046/j.0956-540X.2000.01334.x
103	250	-47.9	101.75	3.1	8.3	5.2	0.7	I	Holmes	2008	2002	10.1029/2008GC002152
103	251	-49.6	109.75	4.4	7.9	3.5	0.7	I	Holmes	2008	2002	10.1029/2008GC002152
103	252	-49.8	115	4.2	8.2	4	0.7	I	Holmes	2008	2002	10.1029/2008GC002152
104	253	-48.3	127.2	3.7	10.3	6.6	0.7	I	Holmes	2010	1994	10.1029/2010gl042621
104	254	-50	133.2	4	7.2	3.2	0.7	I	Holmes	2010	1994	10.1029/2010gl042621
104	255	-50.3	133.1	4	8.6	4.6	0.7	I	Holmes	2010	1994	10.1029/2010gl042621
105	256	-0.22	97	7.8	14.6	6.8	1.5	I	Kieckhefer	1980	1977	10.1029/JB085iB02p00863
106	257	-7.3	101.57	8	16.2	8.2	0.7	I	Kopp	2001	1999	10.1046/j.0956-540x.2001.01547.x
106	258	-9.85	102.8	6.2	14	7.8	0.7	I	Kopp	2001	1999	10.1046/j.0956-540x.2001.01547.x
107	259	-9.83	106	5.3	12.7	7.4	0.7	I	Kopp	2002	1999	10.1029/2000jb000095
108	260	14.1	53	3.8	9.6	5.8	1.2	I	Laughton	1966	1958	10.1098/rsta.1966.0004
109	261	-20.81	40.9	6	13.6	7.6	0.5	I	Leinweber	2010	2007	10.1016/j.tecto.2013.04.015
110	262	-64.7	25.5	7.3	13.3	6	1.5	I	Leitchenkov	2008	1996	10.1007/s11001-008-9051-z
110	263	-67.5	24	7.6	13.5	5.9	1.5	I	Leitchenkov	2008	1996	10.1007/s11001-008-9051-z
111	264	-63.5	108.5	7.8	13.4	5.6	1.2	I	Leitchenkov	2014	1996	10.1134/S001685211401004X
112	265	-37.67	50.48	1.9	11.1	9.2	0.5	I	Li	2015	2010	10.1002/2014GL062521
112	266	-37.7	49.97	3.4	7.1	3.7	0.5	I	Li	2015	2010	10.1002/2014GL062521
112	267	-37.75	49.75	3	10.2	7.2	0.5	I	Li	2015	2010	10.1002/2014GL062521
112	268	-37.77	49.53	3.5	7.4	3.9	0.5	I	Li	2015	2010	10.1002/2014GL062521
113	269	-4.8	79.88	5.1	10.5	5.4	1.2	I	Louden	1995	1988	10.1111/j.1365-246X.1995.tb01826.x
113	270	-4.5	79.88	4.8	10.6	5.8	1.2	I	Louden	1995	1988	10.1111/j.1365-246X.1995.tb01826.x
113	271	-5.4	79.83	5.2	11.4	6.2	1.2	I	Louden	1995	1988	10.1111/j.1365-246X.1995.tb01826.x
113	272	-4.25	79.4	4.9	11.1	6.2	1.2	I	Louden	1995	1988	10.1111/j.1365-246X.1995.tb01826.x
114	273	-4.55	42.5	7.8	13.1	5.3	1	I	Makris	2012	2007	NA/3
115	274	17.2	65	9	13.6	4.6	0.7	I	Minshull	2008	2003	10.1038/ngeo228
115	275	17.9	65.1	8.9	13	4.1	0.7	I	Minshull	2008	2003	10.1038/ngeo228
116	276	-31.5	62	4	8.8	4.8	1.5	I	Minshull	1996	1962	10.1111/j.1365-246X.1996.tb06541.x
117	277	-27.58	65.85	5.25	7.75	2.5	0.5	I	Minshull	2006	1999	10.1111/j.1365-246X.2006.03001.x
117	278	-27.55	66.29	4.6	10	5.4	0.5	I	Minshull	2006	1999	10.1111/j.1365-246X.2006.03001.x
117	279	-27.7	65.57	3.4	9.1	5.7	0.5	I	Minshull	2006	1999	10.1111/j.1365-246X.2006.03001.x
117	280	-27.7	65.9	4.1	6.9	2.8	0.5	I	Minshull	2006	1999	10.1111/j.1365-246X.2006.03001.x
117	281	-28.03	66	2.7	6.5	3.8	0.5	I	Minshull	2006	1999	10.1111/j.1365-246X.2006.03001.x
118	282	-27.71	66.05	3.8	7.8	4	1.2	I	Muller	1999	1994	10.1130/0091-7613(1999)​027<0867:SAMSAT>​2.3.CO;2
118	283	-27.71	66.42	2.7	8.5	5.8	1.2	I	Muller	1999	1994	10.1130/0091-7613(1999)​027<0867:SAMSAT>​2.3.CO;2
119	284	-32.28	57.28	2.9	7.2	4.3	1	I	Muller	2000	1994	10.1029/2000JB900262
119	285	-32.73	57.28	0.9	5.8	4.9	1	I	Muller	2000	1994	10.1029/2000JB900262
120	286	13.11	63.23	7.62	12.7	5.08	1.5	I	Naini	1982	1974	N/A_naini1982
120	287	17.59	63.9	6.1	13.1	7	1.5	I	Naini	1982	1974	N/A_naini1982
120	288	19.11	62.93	4.4	11.3	6.9	1.5	I	Naini	1982	1974	N/A_naini1982
120	289	12.79	65.04	6.1	11.9	5.8	1.5	I	Naini	1982	1974	N/A_naini1982
120	290	12.58	65.28	6.1	11	4.9	1.5	I	Naini	1982	1974	N/A_naini1982
120	291	15.24	66.21	6.1	11.6	5.5	1.5	I	Naini	1982	1974	N/A_naini1982
120	292	13.77	67.236	5.8	10.1	4.3	1.5	I	Naini	1982	1974	N/A_naini1982
120	293	14.91	67.35	6.1	10.4	4.3	1.5	I	Naini	1982	1974	N/A_naini1982
120	294	18.64	65.18	6.3	12	5.7	1.5	I	Naini	1982	1974	N/A_naini1982
121	295	-37.82	49.45	3.3	8.5	5.2	0.5	I	Niu	2015	2012	10.1002/2014GC005645
121	296	-37.73	50.01	2.9	8.7	5.8	0.5	I	Niu	2015	2012	10.1002/2014GC005645
121	297	-37.65	50.48	2	12.2	10.2	0.5	I	Niu	2015	2012	10.1002/2014GC005645
122	298	-11.8	115.93	5.8	14.1	8.3	0.5	I	Planert	2010	2006	10.1029/2009jb006713
122	299	-11.4	115.98	6.1	14.9	8.8	0.5	I	Planert	2010	2006	10.1029/2009jb006713
122	300	-11.65	118.91	5.6	14.3	8.7	0.5	I	Planert	2010	2006	10.1029/2009jb006713
122	301	-11.4	118.95	5.6	14.1	8.5	0.5	I	Planert	2010	2006	10.1029/2009jb006713
123	302	-3.75	-102.8	3.2	9.7	6.5	0.3	I	Roland	2011	2008	10.1029/2012jb009422
124	303	-10.83	113.3	7.6	17.3	9.7	0.7	I	Shulgin	2011	1999	10.1111/j.1365-246X.2010.04834.x
125	304	1.7	96.05	7	14.2	7.2	0.5	I	Shulgin	2013	2006	10.1016/j.epsl.2012.12.032
126	305	4.1	93.05	8.2	14	5.8	0.7	I	Singh	2011	2006	10.1111/j.1365-246X.2010.04823.x
126	306	2.5	94.5	8.5	13.8	5.3	0.7	I	Singh	2011	2006	10.1111/j.1365-246X.2010.04823.x
127	307	-38	49.6	1.8	4.3	2.5	0.5	I	Zhao	2013	2010	10.1002/ggge.20264
127	308	-37.7	49.7	2.1	8.9	6.8	0.5	I	Zhao	2013	2010	10.1002/ggge.20264
128	309	18.5	156.8	6.5	14.2	7.7	0.7	P	Abrams	1993	1988	10.1029/GM077
129	310	1.95	-80.15	4	10.3	6.3	0.7	P	Agudelo	2009	2001	10.1029/2008jb005690
130	311	12.89	-90.91	7.4	12.5	5.1	1	P	Ambos	1985	1979	10.2973/dsdp.proc.84.139.1985
131	312	23.05	125.15	7.1	13.7	6.6	0.5	P	Arai	2016	2013	10.1038/ncomms12255
131	313	22.58	125.29	6.1	12.4	6.3	0.5	P	Arai	2016	2013	10.1038/ncomms12255
132	314	-17.5	-114.9	3.1	8.7	5.6	0.7	P	Bazin	1998	1995	10.1029/98GL51590
132	315	-17.12	-112.25	2.8	8.6	5.8	0.7	P	Bazin	1998	1995	10.1029/98GL51590
133	316	53.72	-154.4	5	10.7	5.7	0.7	P	Becel	2015	2011	10.1016/j.epsl.2015.05.016
134	317	43.88	159.8	5.8	12.1	6.3	0.5	P	Bee	1989	1982	10.1007/BF00282578
135	318	10.5	-103.6	3.2	8.8	5.6	0.7	P	Begnaud	1997	1994	10.1029/96JB03393
135	319	10.37	-103.6	3.2	9.1	5.9	0.7	P	Begnaud	1997	1994	10.1029/96JB03393
136	320	12.3	-104.35	0.5	6	5.5	1	P	Bratt	1984	1979	10.1029/JB089iB07p06111
137	321	8.68	-104.38	2.9	9.4	6.5	0.5	P	Canales	2003	1997	10.1046/j.1365-246X.2003.01885.x
137	322	9	-104.39	3	9.1	6.1	0.5	P	Canales	2003	1997	10.1046/j.1365-246X.2003.01885.x
137	323	9.6667	-104.47	2.9	9.4	6.5	0.5	P	Canales	2003	1997	10.1046/j.1365-246X.2003.01885.x
137	324	9.57	-104.37	2.9	9.6	6.7	0.5	P	Canales	2003	1997	10.1046/j.1365-246X.2003.01885.x
137	325	8.72	-104.1	3	10.2	7.2	0.5	P	Canales	2003	1997	10.1046/j.1365-246X.2003.01885.x
137	326	9.42	-104.13	3	9.6	6.6	0.5	P	Canales	2003	1997	10.1046/j.1365-246X.2003.01885.x
137	327	10	-104.21	2.8	8.6	5.8	0.5	P	Canales	2003	1997	10.1046/j.1365-246X.2003.01885.x
137	328	8.5	-104.03	2.9	8.5	5.6	0.5	P	Canales	2003	1997	10.1046/j.1365-246X.2003.01885.x
137	329	9.28	-104.08	3	10.1	7.1	0.5	P	Canales	2003	1997	10.1046/j.1365-246X.2003.01885.x
137	330	9.78	-104.1	2.9	9.1	6.2	0.5	P	Canales	2003	1997	10.1046/j.1365-246X.2003.01885.x
138	331	-10.8	-140.9	4.6	9.8	5.2	1.2	P	Caress	1995	1992	10.1038/373600a0
138	332	-7.75	-137.3	4.2	9.7	5.5	1.2	P	Caress	1995	1992	10.1038/373600a0
139	333	50.5	-131.5	2.5	8.8	6.3	0.5	P	Cheung	1981	1976	10.1111/j.1365-246X.1981.tb02700.x
140	334	9.61	-86.2	4.3	11.2	6.9	0.7	P	Christeson	1999	1996	10.1029/1999JB900251
141	335	58.72	-141.8	6	11.5	5.5	0.5	P	Christeson	2010	2008	10.1130/G31170.1
142	336	44.55	-130.08	2.7	9.1	6.4	0.5	P	Christeson	2010	2004	10.1029/2009gc002864
142	337	44.45	-130.12	2.4	8.8	6.4	0.5	P	Christeson	2010	2004	10.1029/2009gc002864
143	338	49.5	-130.3	2.4	5.2	2.8	1	P	Clowes	1976	1974	10.1139/e76-160
143	339	49.4	-130.7	2.2	10.9	8.7	1	P	Clowes	1976	1974	10.1139/e76-160
144	340	1.25	-83.7	3.7	8.7	5	0.5	P	Collins	1989	1985	10.1029/JB094iB07p09283
145	341	-43.11	-77.82	3.8	9.4	5.6	0.7	P	Contreras-Reyes	2007	2005	10.1029/2007GC001632
145	342	-42.95	-76.45	3.9	9.6	5.7	0.5	P	Contreras-Reyes	2007	2005	10.1029/2007GC001632
145	343	-42.89	-75.61	4.2	9.5	5.3	0.7	P	Contreras-Reyes	2007	2005	10.1029/2007GC001632
146	344	-37.62	-76.4	4.1	11.8	7.7	0.3	P	Contreras-Reyes	2008	2005	10.1029/2007JB005569
146	345	-37.81	-75.18	4.5	11.4	6.9	0.3	P	Contreras-Reyes	2008	2005	10.1029/2007JB005569
147	346	-28.7	-174.6	5.4	11.2	5.8	0.5	P	Contreras-Reyes	2010	2008	10.1016/j.epsl.2009.11.020
147	347	-26.2	-173.85	6	11.1	5.1	0.5	P	Contreras-Reyes	2010	2008	10.1016/j.epsl.2009.11.020
148	348	-24.45	-174.65	7.2	13.4	6.2	0.7	P	Contreras-Reyes	2011	2008	10.1029/2011jb008434
149	349	-32.07	-72.78	4	11.1	7.1	0.7	P	Contreras-Reyes	2015	2000	10.1093/gji/ggv309
149	350	-32.07	-73.1	5.2	12.5	7.3	0.7	P	Contreras-Reyes	2015	2000	10.1093/gji/ggv309
150	351	41.25	-124.96	4.1	10.9	6.8	1.5	P	Cook	1981	1977	N/A
150	352	41.22	-125.6	3.8	10.1	6.3	1.5	P	Cook	1981	1977	N/A
150	353	41.23	-126.32	3.2	9.3	6.1	1.5	P	Cook	1981	1977	N/A
150	354	41.27	-126.86	3.2	8.5	5.3	1.5	P	Cook	1981	1977	N/A
150	355	42.49	-126.15	2.8	7.9	5.1	1.5	P	Cook	1981	1977	N/A
150	356	42.371	-126.16	3	8.4	5.4	1.5	P	Cook	1981	1977	N/A
150	357	41.56	-126.15	3.2	8.1	4.9	1.5	P	Cook	1981	1977	N/A
150	358	40.74	-126.1	3.7	9.7	6	1.5	P	Cook	1981	1977	N/A
151	359	-18.9	-170.8	5.4	11	5.6	1.2	P	Crawford	2003	1994	10.1029/2001JB001435
152	360	48.9	-128.8	3.5	13.7	10.2	1.5	P	Davis	1976	1973	10.1029/JB081i020p03541
153	361	52.83	-132.95	3.9	10	6.1	1.2	P	Dehler	1988	1983	10.1139/e88-175
154	362	32.49	151.25	6	14.4	8.4	0.5	P	Den	1969	1966	10.1029/JB074i006p01421
154	363	37.95	172.63	6.1	12.5	6.4	1.2	P	Den	1969	1966	10.1029/JB074i006p01421
155	364	20.4	123.2	7.7	13.9	6.2	1.2	P	Deng	2014	2006	10.3319/TAO.2014.08.28.01(T)
155	365	21.6	123.2	6.3	12.1	5.8	1.2	P	Deng	2014	2006	10.3319/TAO.2014.08.28.01(T)
156	366	43.9	159.82	6.1	13.4	7.3	0.5	P	Duennebier	1987	1982	N/A1
157	367	23.17	123.22	8.5	13.1	4.6	0.7	P	Eakin	2015	2009	10.1002/2014GC005548
157	368	22.74	123.25	4.9	10.2	5.3	0.7	P	Eakin	2015	2009	10.1002/2014GC005548
158	369	53.47	-155.18	5.2	11.6	6.4	1	P	Ewing	1969	1962	10.1029/JB074i027p06706
158	370	5.33	177.22	6.4	13.3	6.9	1	P	Ewing	1969	1962	10.1029/JB074i027p06706
159	371	47.23	-126.7	3.9	10	6.1	0.7	P	Flueh	1998	1996	10.1016/S0040-1951(98)00091-2
159	372	46.62	-126.45	4	9.2	5.2	0.7	P	Flueh	1998	1996	10.1016/S0040-1951(98)00091-2
160	373	-32.65	-73.4	4.5	10.9	6.4	1	P	Flueh	1998	1995	10.1016/s0040-1951(97)00299-0
160	374	-33.35	-73.3	4.2	10	5.8	1	P	Flueh	1998	1995	10.1016/s0040-1951(97)00299-0
161	375	41.67	147	6.2	13.3	7.1	0.3	P	Fujie	2013	2009	10.1029/2012GL054340
161	376	40.32	148	6.1	13.2	7.1	0.3	P	Fujie	2013	2009	10.1029/2012GL054340
161	377	38.11	149	6.4	12.9	6.5	0.3	P	Fujie	2013	2009	10.1029/2012GL054340
162	378	38.65	145.35	5.8	12.7	6.9	0.3	P	Fujie	2016	2010	10.1002/2015GL067363
162	379	39.2	145.5	5.7	13.2	7.5	0.3	P	Fujie	2016	2010	10.1002/2015GL067363
162	380	39.9	145.6	5.6	12.7	7.1	0.3	P	Fujie	2016	2010	10.1002/2015GL067363
163	381	-2.65	-81.85	4.4	11.4	7	0.7	P	Gailler	2007	2001	10.1016/j.epsl.2007.05.045
163	382	1.9	-79.8	5.4	10.8	5.4	0.7	P	Gailler	2007	2001	10.1016/j.epsl.2007.05.045
164	383	44.6	-126.5	4.5	9.1	4.6	0.7	P	Gerdom	2000	1996	10.1016/S0040-1951(00)00190-6
165	384	11.8	-103.5	0	6.4	6.4	1	P	Gettrust	1982	1979	10.1029/JB087iB10p08435
165	385	11.7	-101.8	0	5.5	5.5	1	P	Gettrust	1982	1979	10.1029/JB087iB10p08435
166	386	7.6	165.4	1.9	8.8	6.9	1	P	Gladczenko	1997	1975	10.1029/97JB01636
167	387	18.24	129.08	6	10.8	4.8	1	P	Goodman	1989	1981	10.1007/BF00340202.
167	388	16.95	133.42	6	9.8	3.8	1	P	Goodman	1989	1981	10.1007/BF00340202.
168	389	-15.2	-108.4	3.1	9.2	6.1	0.7	P	Grevemeyer	1998	1995	10.1046/j.1365-246X.1998.00673.x
169	390	10.1	-86.84	3.8	8.8	5	0.5	P	Grevemeyer	2007	1999	10.1016/j.epsl.2007.04.013
170	391	13.2	-104.15	2.8	9.1	6.3	0.3	P	Harding	1989	1985	10.1029/JB094iB09p12163
171	392	-3.37	-114.13	4.3	9.2	4.9	0.7	P	Helmberger	1978	1968	N/A
172	393	37.22	-123.47	5	12.4	7.4	1.2	P	Holbrook	1996	1991	10.1029/96JB01642
173	394	50.5	-172.2	6.8	11.8	5	1	P	Holbrook	1999	1994	10.1130/0091-7613(1999)027<0031:SACOTA>2.3.CO;2
174	395	33.1	144.6	6.4	14.1	7.7	1.5	P	Houtz	1980	1976	10.1029/JB085iB01p00267
174	396	34.3	145.04	6.3	14.1	7.8	1.5	P	Houtz	1980	1976	10.1029/JB085iB01p00267
174	397	34.56	155.11	6.6	12.3	5.7	1.5	P	Houtz	1980	1976	10.1029/JB085iB01p00267
174	398	34.03	150.58	7	11.3	4.3	1.5	P	Houtz	1980	1976	10.1029/JB085iB01p00267
174	399	34.73	144.07	6.3	14.5	8.2	1.5	P	Houtz	1980	1976	10.1029/JB085iB01p00267
174	400	39.77	146.46	5.6	12.9	7.3	1.5	P	Houtz	1980	1976	10.1029/JB085iB01p00267
174	401	34.09	150.7	6.5	11.3	4.8	1.5	P	Houtz	1980	1976	10.1029/JB085iB01p00267
174	402	34.52	146.64	6.2	13.1	6.9	1.5	P	Houtz	1980	1976	10.1029/JB085iB01p00267
175	403	-10.8	-81.8	4	10.2	6.2	1.5	P	Hussong	1976	1972	10.1029/GM019p0071
175	404	-10.2	-82.8	6.3	11.4	5.1	1.5	P	Hussong	1976	1972	10.1029/GM019p0071
175	405	-8.4	-82.2	4.3	11.4	7.1	1.5	P	Hussong	1976	1972	10.1029/GM019p0071
175	406	-7.9	-82	4.3	11.2	6.9	1.5	P	Hussong	1976	1972	10.1029/GM019p0071
176	407	-12.5	-160.1	5.1	12	6.9	1.2	P	Hussong	1979	1973	10.1029/JB084iB11p06003
177	408	10.7	-88.5	3.7	9.7	6	0.5	P	Ivandic	2010	2005	10.1111/j.1365-246X.2009.04474.x
177	409	10.55	-87.4	2.8	8.9	6.1	0.5	P	Ivandic	2010	2005	10.1111/j.1365-246X.2009.04474.x
178	410	40.88	146.15	6	13.7	7.7	1.5	P	Iwasaki	1989	1983	10.1016/0040-1951(89)90056-5
179	411	18	155.95	6.2	13.9	7.7	0.5	P	Kaneda	2010	2006	10.1029/2010gc003231
179	412	19.5	156.5	6.4	13.8	7.4	0.5	P	Kaneda	2010	2006	10.1029/2010gc003231
179	413	24.6	157.8	6.1	13.4	7.3	0.5	P	Kaneda	2010	2006	10.1029/2010gc003231
180	414	26.5	-147.55	2.8	8.9	6.1	0.7	P	Kempner	1982	1978	10.1029/JB087iB10p08447
180	415	29.15	-148.2	2.8	8.8	6	0.7	P	Kempner	1982	1978	10.1029/JB087iB10p08447
180	416	28.8	-148.1	2.8	9.1	6.3	0.7	P	Kempner	1982	1978	10.1029/JB087iB10p08447
181	417	25.12	128.9	1.8	7.7	5.9	1	P	Kodaira	1996	1988	10.1016/S0040-1951(96)00025-X
182	418	31.6	134.9	5.8	11.5	5.7	0.5	P	Kodaira	2000	1995	10.1029/1999JB900394
183	419	-32.35	-74.33	4.5	11.8	7.3	0.5	P	Kopp	2004	2000	10.1029/2003TC001590
184	420	32.6	-161.1	5.6	12.8	7.2	0.7	P	Kopp	2003	1999	10.1029/2002jb002015
184	421	26.5	-161.3	4.6	11.1	6.5	0.7	P	Kopp	2003	1999	10.1029/2002jb002015
185	422	-8.5	-81.8	5.1	10.3	5.2	0.7	P	Krabbenhoeft	2004	2000	10.1111/j.1365-246X.2004.02425.x
185	423	-11.8	-80.5	5	10.8	5.8	0.7	P	Krabbenhoeft	2004	2000	10.1111/j.1365-246X.2004.02425.x
185	424	-14	-77.9	4.8	11.2	6.4	0.7	P	Krabbenhoeft	2004	2000	10.1111/j.1365-246X.2004.02425.x
186	425	40.58	-125.6	3.3	10	6.7	1.2	P	Leitner	1998	1994	10.1029/98JB02050
187	426	12.1	-103.8	3	9	6	1.2	P	Lewis	1982	1979	10.1029/JB087iB10p08417
187	427	12.5	-103.65	3	8.1	5.1	1.2	P	Lewis	1982	1979	10.1029/JB087iB10p08417
187	428	12.4	-104.2	3	8.1	5.1	1.2	P	Lewis	1982	1979	10.1029/JB087iB10p08417
188	429	14.4	-95	3.6	9.7	6.1	1.2	P	Lewis	1977	1973	10.1038/266340a0
189	430	12.8	-103.8	3.1	8.1	5	1	P	Lewis	1979	1973	10.1016/0040-1951(79)90336-6
189	431	13.3	-102.5	3.3	8.8	5.5	1	P	Lewis	1979	1973	10.1016/0040-1951(79)90336-6
189	432	13	-100.7	3.2	9.7	6.5	1	P	Lewis	1979	1973	10.1016/0040-1951(79)90336-6
190	433	19.25	-159.1	4.5	10.9	6.4	0.5	P	Lindwall	1991	1986	10.1029/91JB00149
191	434	52.2	-163.4	6.2	12	5.8	1	P	Lizarralde	2002	1994	10.1029/2001JB000230
192	435	21.5	-126.5	4.6	11	6.4	0.7	P	Ludwig	1980	1976	10.1016/0025-3227(80)90025-0
193	436	-47.6	-77.4	4.1	9.8	5.7	0.3	P	Maksymowicz	2012	2004	10.1016/j.epsl.2012.06.023
194	437	22.4	-108.3	3.1	9	5.9	0.5	P	McClain	1980	1976	10.1016/0025-3227(80)90028-6
195	438	-14.5	-111.75	3	10	7	1	P	McClain	1985	1953	10.1029/GL012i010p00689
195	439	-15	-112.6	3	8.5	5.5	1	P	McClain	1985	1953	10.1029/GL012i010p00689
196	440	47.2	-129.15	2.7	8.3	5.6	1	P	McClain	1982	1978	10.1029/JB087iB10p08477
197	441	47.9	-127.8	4.5	10.5	6	0.5	P	McClymont	2005	1980	10.1016/j.tecto.2005.05.026
198	442	-19.1	-73.5	4.5	11.1	6.6	1	P	Meeder	1977	1976	10.1016/0012-821X(77)90142-X
199	443	-135.6	48.35	4.6	9.3	4.7	1.5	P	Milne	1964	1958	NA6
200	444	-7.1	161.62	5.1	12.9	7.8	1	P	Miura	2004	1995	10.1016/j.tecto.2003.09.029
201	445	-34.25	-74.2	4.7	10.6	5.9	0.7	P	Moscoso	2011	2008	10.1016/j.epsl.2011.04.025
202	446	20.8	132	5.9	11.2	5.3	1.2	P	Murauchi	1968	1965	10.1029/JB073i010p03143
202	447	23.8	127.9	6.2	12.1	5.9	1.2	P	Murauchi	1968	1965	10.1029/JB073i010p03143
202	448	23.7	145.2	6.5	13.4	6.9	1.2	P	Murauchi	1968	1965	10.1029/JB073i010p03143
202	449	14.1	131	5.8	11.8	6	1.2	P	Murauchi	1968	1965	10.1029/JB073i010p03143
203	450	30.8	136.4	4.4	11.6	7.2	1	P	Nishizawa	2006	2002	N/A1
203	451	30	137.62	5.2	12.1	6.9	1	P	Nishizawa	2006	2002	N/A1
204	452	20.8	135.9	6.5	11	4.5	1	P	Nishizawa	2007	2004	N/A2
204	453	19.95	137.2	5.7	11.5	5.8	1	P	Nishizawa	2007	2004	N/A2
204	454	16.4	135.4	6.1	10.3	4.2	1	P	Nishizawa	2007	2004	N/A2
204	455	16.4	136.8	5.5	10.5	5	1	P	Nishizawa	2007	2004	N/A2
204	456	16.4	137.4	4.8	10.4	5.6	1	P	Nishizawa	2007	2004	N/A2
205	457	29	132.15	5.5	12.7	7.2	0.5	P	Nishizawa	2014	2004	10.1186/1880-5981-66-25
205	458	20.9	133.7	5.8	13.1	7.3	0.5	P	Nishizawa	2014	2004	10.1186/1880-5981-66-25
205	459	23.1	129.05	5.8	10.7	4.9	0.5	P	Nishizawa	2014	2004	10.1186/1880-5981-66-25
205	460	21.1	132.08	5	12	7	0.5	P	Nishizawa	2014	2004	10.1186/1880-5981-66-25
205	461	26.85	131.95	5.1	11	5.9	0.5	P	Nishizawa	2014	2004	10.1186/1880-5981-66-25
205	462	22.4	133.4	5.4	11.8	6.4	0.5	P	Nishizawa	2014	2004	10.1186/1880-5981-66-25
205	463	23.3	135.8	5.7	13.1	7.4	0.5	P	Nishizawa	2014	2004	10.1186/1880-5981-66-25
206	464	27.26	149.18	5.9	13.3	7.4	0.7	P	Oikawa	2010	2006	10.5047/eps.2010.02.011
206	465	26.2	150.46	5.8	13	7.2	0.7	P	Oikawa	2010	2006	10.5047/eps.2010.02.011
206	466	26.84	149.2	6	13.1	7.1	0.7	P	Oikawa	2010	2006	10.5047/eps.2010.02.011
206	467	27.94	150.28	6	13.1	7.1	0.7	P	Oikawa	2010	2006	10.5047/eps.2010.02.011
207	468	9	-104.2	1.8	7.8	6	1	P	Orcutt	1976	1974	10.1111/j.1365-246X.1976.tb00328.x
208	469	-12.87	-103.82	3.5	9	5.5	1	P	Orcutt	1984	1982	10.1144/GSL.SP.1984.013.01.01
209	470	22.55	-108.9	3	9.4	6.4	0.5	P	Paramo	2008	2002	10.1029/2007JB005113
209	471	22.3	-108.2	2.9	9.3	6.4	0.5	P	Paramo	2008	2002	10.1029/2007JB005113
210	472	46.6	-125.9	3.9	9.8	5.9	0.7	P	Parsons	1998	1995	10.1130/0091-7613(1998)026<0199:ANVITC>2.3.CO;2
211	473	12.6	113.4	3	8.1	5.1	0.5	P	Pichot	2014	2011	10.1016/j.marpetgeo.2013.10.008
212	474	11.2	113.5	5.5	11	5.5	1	P	Qiu	2011	2008	10.3969/j.issn.0001-5733.2011.12.012
213	475	27.4	-121.58	7.17	11.61	4.44	1.5	P	Raitt	1956	1952	10.1130/0016-7606(1956)67[1623:SSOTPO]2.0.CO;2
213	476	19.37	-128.5	5.73	10.73	5	1.5	P	Raitt	1956	1952	10.1130/0016-7606(1956)67[1623:SSOTPO]2.0.CO;2
213	477	14.68	-151.9	4.95	11.06	6.11	1.5	P	Raitt	1956	1952	10.1130/0016-7606(1956)67[1623:SSOTPO]2.0.CO;2
213	478	20.43	-154.9	6.97	12.41	5.44	1.5	P	Raitt	1956	1952	10.1130/0016-7606(1956)67[1623:SSOTPO]2.0.CO;2
213	479	10.03	-177.32	7.87	13.04	5.17	1.5	P	Raitt	1956	1952	10.1130/0016-7606(1956)67[1623:SSOTPO]2.0.CO;2
213	480	12.45	168.37	5.74	11.24	5.5	1.5	P	Raitt	1956	1952	10.1130/0016-7606(1956)67[1623:SSOTPO]2.0.CO;2
213	481	11.2	165.17	7.59	13.12	5.53	1.5	P	Raitt	1956	1952	10.1130/0016-7606(1956)67[1623:SSOTPO]2.0.CO;2
213	482	-9.02	174.93	6.33	11.81	5.48	1.5	P	Raitt	1956	1952	10.1130/0016-7606(1956)67[1623:SSOTPO]2.0.CO;2
213	483	-17.47	-160.98	5.76	10.96	5.2	1.5	P	Raitt	1956	1952	10.1130/0016-7606(1956)67[1623:SSOTPO]2.0.CO;2
213	484	-12.78	-143.55	6.91	11.77	4.86	1.5	P	Raitt	1956	1952	10.1130/0016-7606(1956)67[1623:SSOTPO]2.0.CO;2
213	485	10.67	-142.42	7.21	12.04	4.83	1.5	P	Raitt	1956	1952	10.1130/0016-7606(1956)67[1623:SSOTPO]2.0.CO;2
213	486	-10.75	-133.58	6.16	10.55	4.39	1.5	P	Raitt	1956	1952	10.1130/0016-7606(1956)67[1623:SSOTPO]2.0.CO;2
213	487	-11.77	-128.95	5.41	9.7	4.29	1.5	P	Raitt	1956	1952	10.1130/0016-7606(1956)67[1623:SSOTPO]2.0.CO;2
213	488	-7.33	-118.67	4.51	9.18	4.67	1.5	P	Raitt	1956	1952	10.1130/0016-7606(1956)67[1623:SSOTPO]2.0.CO;2
213	489	0.18	-123.43	5.21	10.05	4.84	1.5	P	Raitt	1956	1952	10.1130/0016-7606(1956)67[1623:SSOTPO]2.0.CO;2
213	490	5.78	-123.98	4.85	9.64	4.79	1.5	P	Raitt	1956	1952	10.1130/0016-7606(1956)67[1623:SSOTPO]2.0.CO;2
213	491	14.97	-124.2	6.38	10.8	4.42	1.5	P	Raitt	1956	1952	10.1130/0016-7606(1956)67[1623:SSOTPO]2.0.CO;2
214	492	-23.42	-71.67	4.5	12	7.5	1	P	Ranero	2004	1995	10.1029/JB095iB10p15529
215	493	-4.95	-106.1	3	10.1	7.1	0.3	P	Roland	2011	2008	10.1029/2012jb009422
215	494	-4.65	-105.9	3.1	10	6.9	0.3	P	Roland	2011	2008	10.1029/2012jb009422
215	495	-4.15	-102.95	3.3	9.8	6.5	0.3	P	Roland	2011	2008	10.1029/2012jb009422
216	496	9.58	-86.22	4	11.1	7.1	1.2	P	Sallares	2001	1995	10.1029/2000JB900245
217	497	-43.2	-78.4	3.8	9.1	5.3	0.7	P	Scherwath	2009	2009	10.1111/j.1365-246X.2009.04298.x
217	498	-42.8	-76.2	3.7	8.9	5.2	0.7	P	Scherwath	2009	2005	10.1111/j.1365-246X.2009.04298.x
217	499	-45	-78	2.8	7.4	4.6	0.7	P	Scherwath	2009	2005	10.1111/j.1365-246X.2009.04298.x
217	500	-44.88	-76.45	2.8	8.2	5.4	0.7	P	Scherwath	2009	2005	10.1111/j.1365-246X.2009.04298.x
217	501	-45.9	-76.9	2.1	6.9	4.8	0.7	P	Scherwath	2009	2005	10.1111/j.1365-246X.2009.04298.x
217	502	-45.83	-76.2	2.3	7.3	5	0.7	P	Scherwath	2009	2005	10.1111/j.1365-246X.2009.04298.x
218	503	-70.9	174.1	1.7	3.2	1.5	0.7	P	Selvans	2014	2007	10.1016/j.epsl.2014.08.029
219	504	-23.82	-165.53	6.9	13.4	6.5	1	P	Shearer	1988	1983	10.1111/j.1365-246X.1985.tb05105.x
220	505	41.3	159.95	5.8	12.9	7.1	0.7	P	Shinohara	2008	2001	10.1016/j.pepi.2008.07.039
221	506	50.5	-176.8	7.7	13.3	5.6	1.2	P	Shor	1962	1956	NA5
221	507	53.7	-161.2	7.5	13.6	6.1	1.2	P	Shor	1962	1956	NA5
222	508	22.95	-152.98	5	10.1	5.1	1.2	P	Shor	1964	1962	10.1029/JZ069i008p01627
222	509	22.73	-153.72	4.9	9.9	5	1.2	P	Shor	1964	1962	10.1029/JZ069i008p01627
222	510	22.5	-154.42	4.9	11.6	6.7	1.2	P	Shor	1964	1962	10.1029/JZ069i008p01627
222	511	22.42	-156.52	4.9	11.1	6.2	1.2	P	Shor	1964	1962	10.1029/JZ069i008p01627
222	512	23.05	-156.53	4.2	9.1	4.9	1.2	P	Shor	1964	1962	10.1029/JZ069i008p01627
222	513	23.62	-156.13	4.2	10.8	6.6	1.2	P	Shor	1964	1962	10.1029/JZ069i008p01627
222	514	21.95	-154.8	4.7	10.7	6	1.2	P	Shor	1964	1962	10.1029/JZ069i008p01627
222	515	22.48	-155.63	4.4	9.1	4.7	1.2	P	Shor	1964	1962	10.1029/JZ069i008p01627
222	516	23.12	-156.17	4.3	11.6	7.3	1.2	P	Shor	1964	1962	10.1029/JZ069i008p01627
222	517	23.18	-157.12	4.4	11	6.6	1.2	P	Shor	1964	1962	10.1029/JZ069i008p01627
223	518	43	-134.45	4.4	10.2	5.8	1.2	P	Shor	1968	1954	10.1029/JB073i006p02175
223	519	43.75	-137.1	4.5	10.2	5.7	1.2	P	Shor	1968	1954	10.1029/JB073i006p02175
223	520	43.92	-125.83	3.8	10.3	6.5	1.2	P	Shor	1968	1954	10.1029/JB073i006p02175
223	521	44.68	-125.85	3.8	9.8	6	1.2	P	Shor	1968	1954	10.1029/JB073i006p02175
223	522	44.7	-132.63	4.3	9.8	5.5	1.2	P	Shor	1968	1954	10.1029/JB073i006p02175
223	523	45	-131.6	3.9	9.6	5.7	1.2	P	Shor	1968	1954	10.1029/JB073i006p02175
223	524	46.08	-128.2	3.9	8.8	4.9	1.2	P	Shor	1968	1954	10.1029/JB073i006p02175
223	525	46.5	-127.03	4	8.8	4.8	1.2	P	Shor	1968	1954	10.1029/JB073i006p02175
224	526	28.8	-117.4	3.8	8.8	5	0.3	P	Spudich	1980	1959	10.1029/JB085iB03p01409
225	527	-173.8	-26.3	5.9	12	6.1	1	P	Stratford	2016	2011	10.1002/2015GC005873
226	528	32.05	142.9	6.2	13.3	7.1	1.2	P	Taira	1998	1991	10.1111/j.1440-1738.1998.00198.x
227	529	32.2	143	6.8	14.4	7.6	1	P	Takahashi	1998	1992	10.1111/j.1440-1738.1998.00197.x
228	530	39.06	144.88	8.2	13.3	5.1	1.5	P	Takahashi	2004	1997	10.1111/j.1365-246X.2004.02350.x
229	531	6.73	91.93	3.7	9.1	5.4	1	P	Teagle	2006	1999	10.2204/iodp.proc.309312.103.2006
230	532	34.76	-121.95	4.8	11.8	7	1.2	P	Trehu	1991	1986	10.1029/90JB00494
231	533	39	145.1	5	12.2	7.2	1.2	P	Tsuru	2002	1996	10.1029/2001JB001664
232	534	10.4	-104.1	3.2	8.6	5.4	0.5	P	VanAvendonk	2001	1994	10.1029/2000JB900459
232	535	10.05	-104	3.1	8.7	5.6	0.5	P	VanAvendonk	2001	1994	10.1029/2000JB900459
233	536	11.05	-87.7	4.8	11.1	6.3	0.3	P	VanAvendonk	2011	2008	10.1029/2011GC003592
233	537	9.85	-86.4	3.9	10.7	6.8	0.3	P	VanAvendonk	2011	2008	10.1029/2011GC003592
234	538	9.57	-104.23	2.9	9.5	6.6	0.5	P	Vera	1990	1985	10.1029/JB095iB10p15529
234	539	9.53	-104.15	3.3	11.4	8.1	0.5	P	Vera	1990	1985	10.1029/JB095iB10p15529
235	540	10.95	-87.78	3.2	8.3	5.1	1	P	Walther	2000	1996	10.1046/j.1365-246x.2000.00134.x
236	541	19.2	-159.3	4.4	11.7	7.3	0.5	P	Watts	1985	1982	10.1038/315105a0
236	542	24.3	-157.5	4.2	10.6	6.4	0.5	P	Watts	1985	1982	10.1038/315105a0
237	543	49.45	-129.8	3.4	11.4	8	1		Malecek	1978	1974	10.1029/JB083iB12p05899
